# Supplementary material
Source: Springer Nature journal article supplement (https://www.springermedizin.de/resource/supplementary/12877_2013_913_MOESM4_ESM.pdf/9440408)
Supplement: MOESM4 [file 9440408]

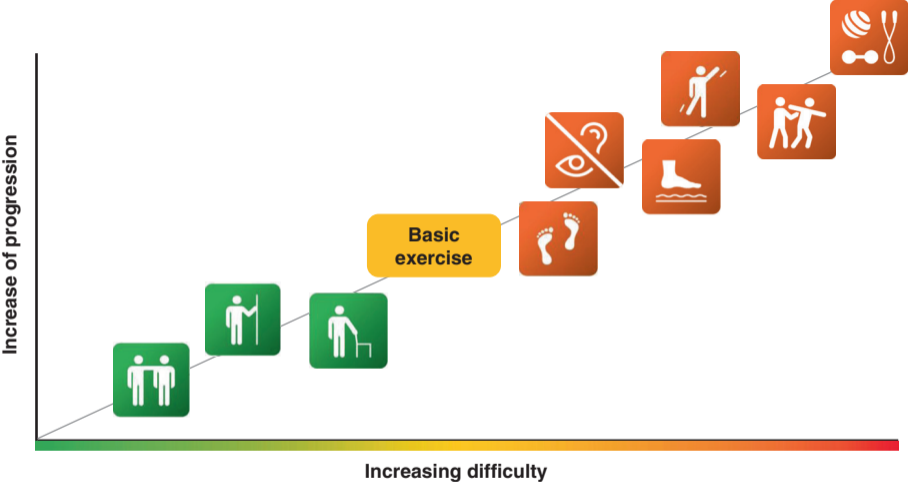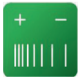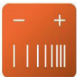

**Execution speed**

Decrease or increase of execution speed may lead to a decrease or increase of difficulty level.
